# Supplementary material for: Spastin Promotes the Migration and Invasion Capability of T98G Glioblastoma Cells by Interacting with Pin1 through Its Microtubule-Binding Domain
Source: MDPI journal article supplement (doi:10.3390/cells12030427), 2023-01-27
Supplement: s1 [file s1]

**Table S1.** List of primers used for the creation of the constructs employed in this study.

| Primer Name                      | Sequence                                                  |
|----------------------------------|-----------------------------------------------------------|
| Spastin <sup>M1&amp;M87</sup> _F | 5'-ACCCAAGCTGGCTAGTTAAGCTTCCACCATGAATTCTCCGGGTGGACGAGG-3' |
| Spastin <sup>M1&amp;M87</sup> _R | 5'-GCCCTCTAGACTCGAGAACAGTGGTATCTCCAAAGTCCT-3'             |
| Spastin_T292A_F                  | 5'-CCTACCACTCATAAGGGTGCTCCGAAAACAAATAGGA-3'               |
| Spastin_T292A_R                  | 5'-AGCAGGACCAGATCCCTG-3'                                  |
| Spastin_T303A_F                  | 5'-AGGACAAATAAACCTTCTGCCCCTACAAGTCTACTCGT-3'              |
| Spastin_T303A_R                  | 5'-ATTTGTTTTTCGGAGCACCCCTT-3'                             |
| Spastin_T292D_F                  | 5'-CCTACCACTCATAAGGGTGATCCGAAAACAAATAGGA-3'               |
| Spastin_T292D_R                  | 5'-AGCAGGACCAGATCCCTG-3'                                  |
| Spastin_T303D_F                  | 5'-AGGACAAATAAACCTTCTGACCCTACAAGTCTACTCGT-3'              |
| Spastin_T303D_R                  | 5'-ATTTGTTTTTCGGATCACCCCTTATG-3'                          |
| Spastin <sup>MBD</sup> _F        | 5'-ACAAAGCTTGCCACCATGCAACCAGTTTGGCATTTCCTCA-3'            |
| Spastin <sup>MBD</sup> _R        | 5'-CCCGCTCGAGTGTTCCATTGTCCACAATTTCATTCA-3'                |
| Spastin <sup>M87</sup> _F        | 5'-CCCAAGCTTATGGCAGCCAAGAGGAGCTC-3'                       |
| Spastin <sup>M87</sup> _R        | 5'-GCCCTCTAGACTCGAGAACAGTGGTATCTCCAAAGTCCT-3'             |

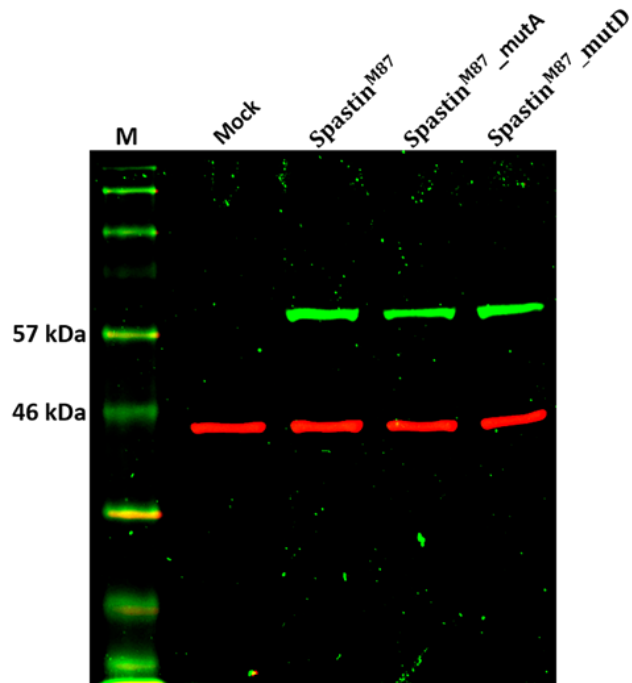

**Figure S1.** Western blot analysis of the proteins expressed from M87-Spastin constructs. Green bands indicate the expressions of either wild-type M87-Spastin (SpastinM87) or mutant M87-Spastin proteins (SpastinM87\_mutA, and SpastinM87\_mutD).  $\beta$ -Actin observed as red bands was used as the loading control.

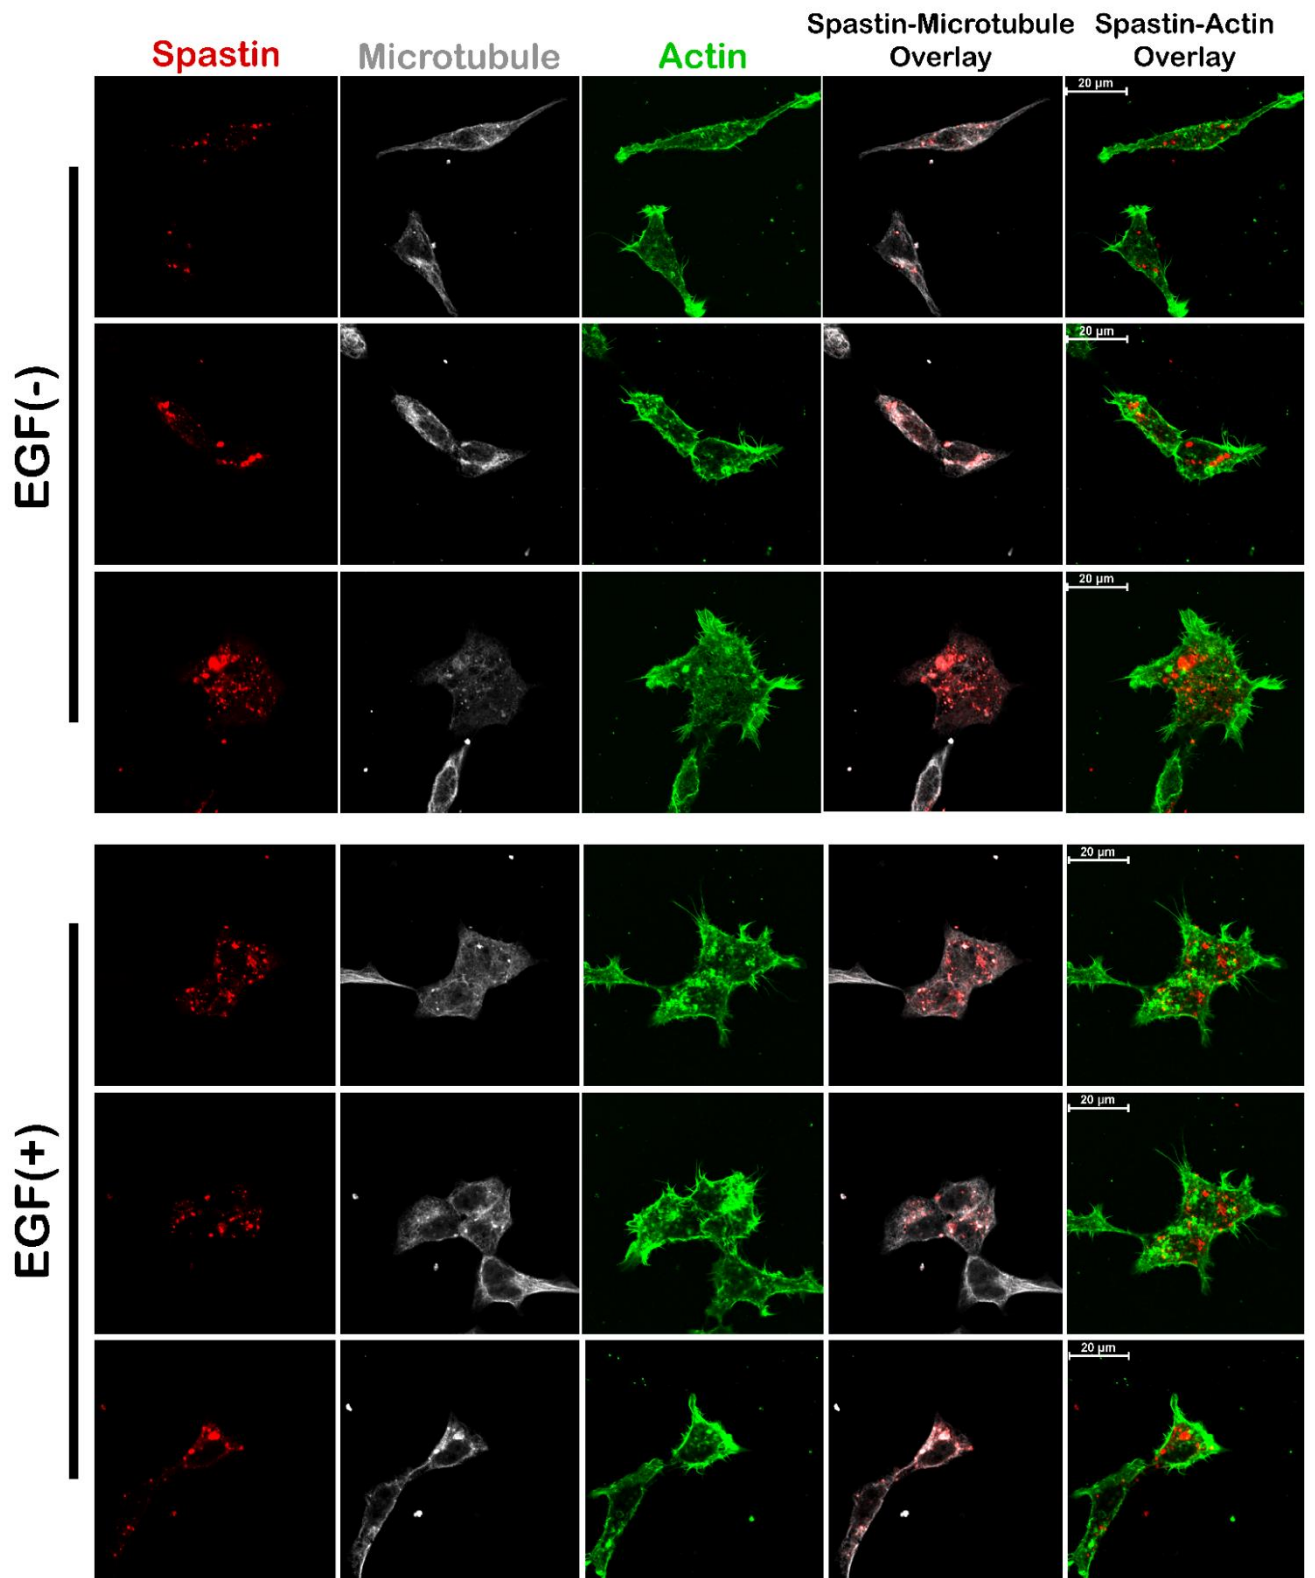

**Figure S2.** Immunocytochemistry assay of full-length Spastin depending on EGF treatment. T98G cells were transfected with a Spastin<sup>M1&M87</sup> vector for 24 h with or without EGF treatment (50 ng/ml). Then, cells were fixed and stained with Myc-tag antibody for Spastin (red), phalloidin for actin filaments (green), and tubulin antibody for microtubule (gray). Cells were visualized by confocal microscopy with a 63x objective.

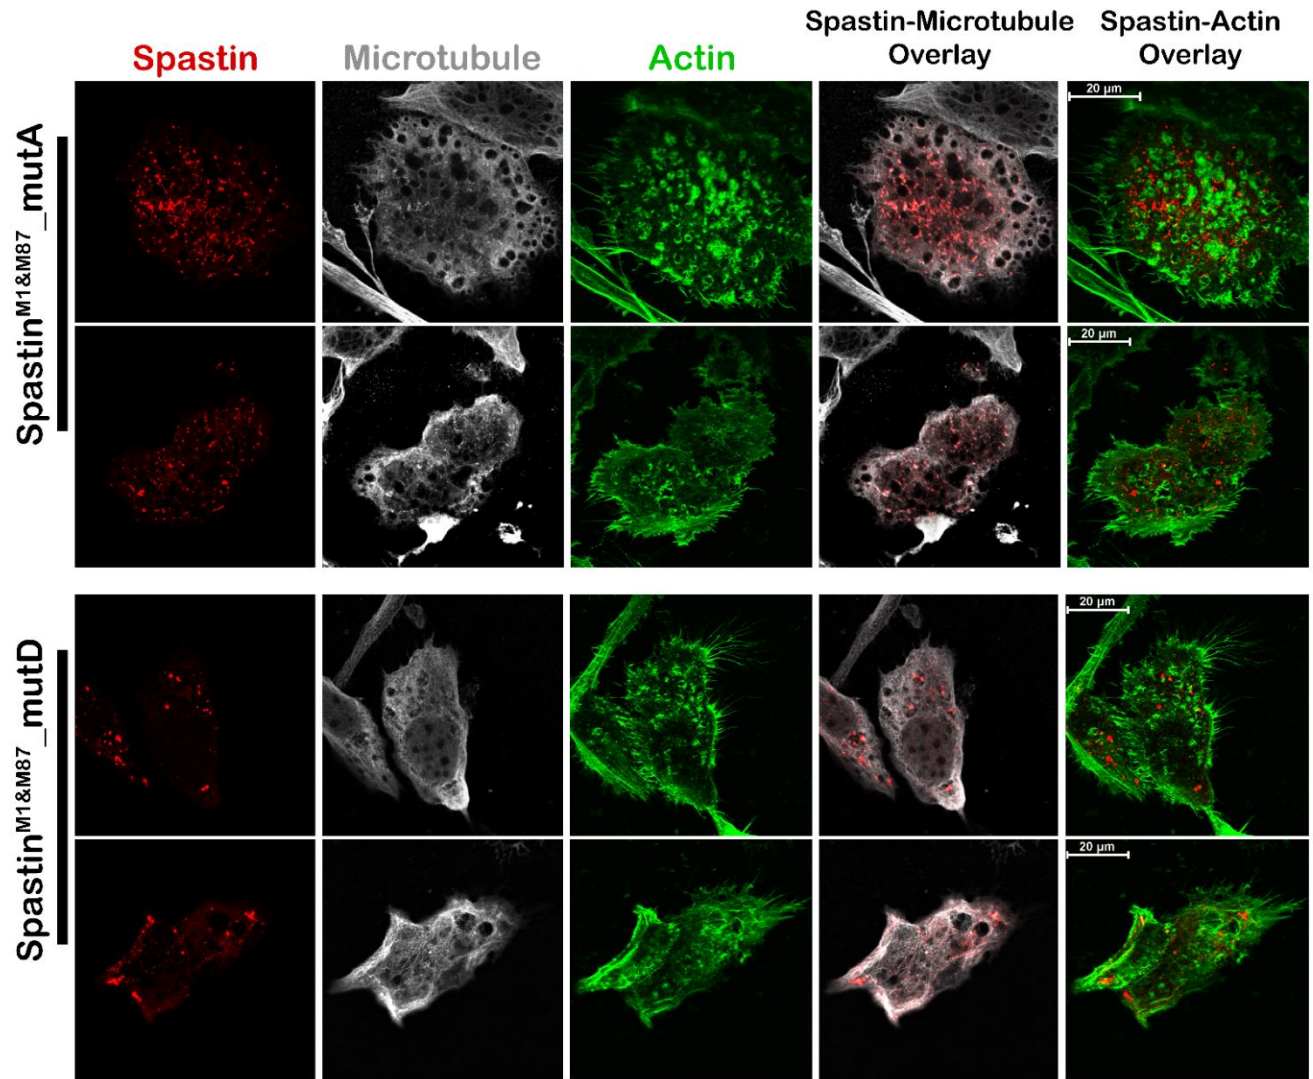

**Figure S3.** Immunocytochemistry assays detecting the localization of mutant full-length Spastin proteins. T98G cells were transfected with either Spastin<sup>M1&M87</sup>\_mutA or Spastin<sup>M1&M87</sup>\_mutD vectors for 24 h. Then, cells were fixed and stained with Myc-tag antibody for Spastin (red), phalloidin for actin filaments (green), and tubulin antibody for microtubule (gray). Cells were visualized by confocal microscopy with a 63x objective.

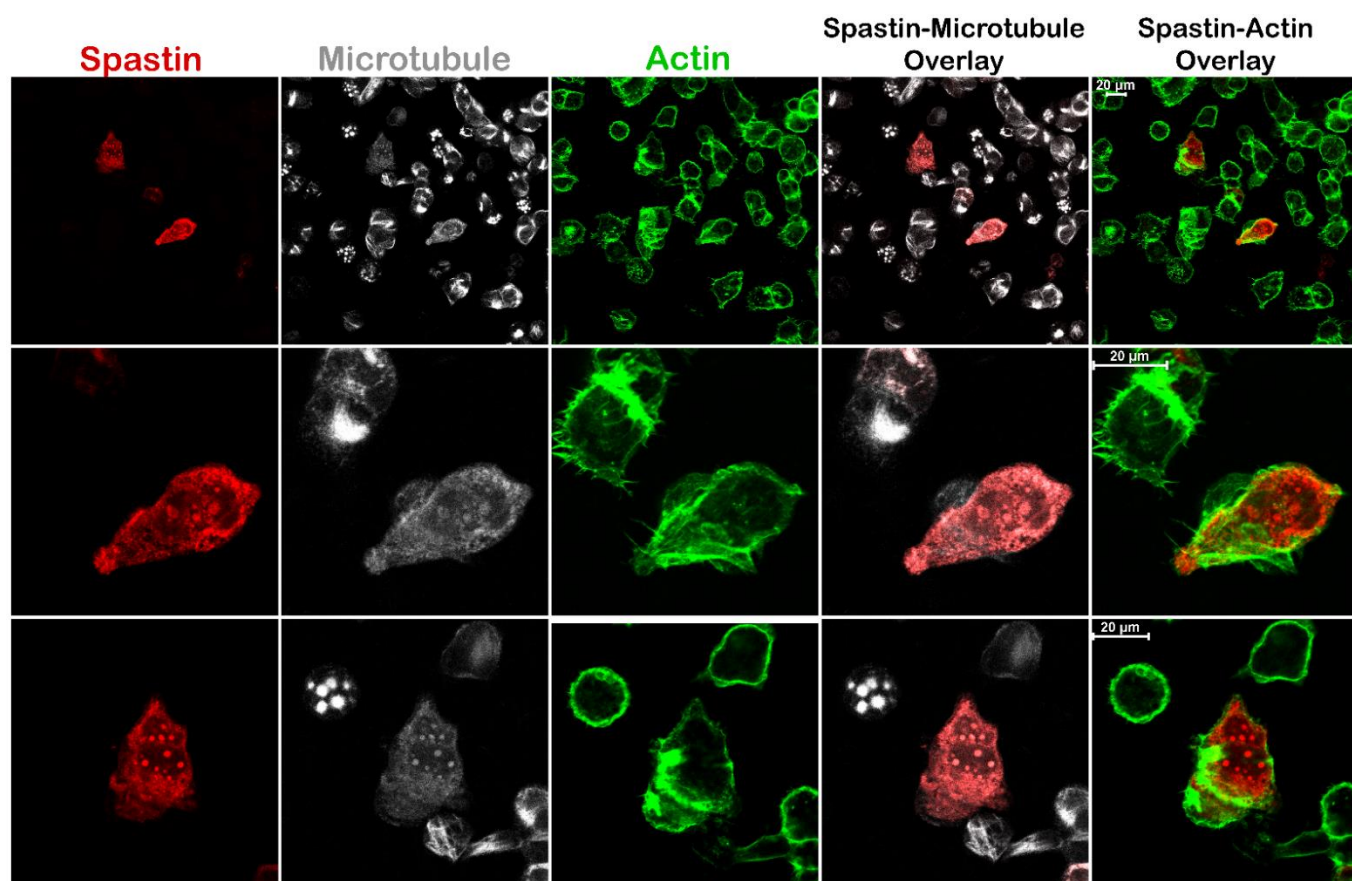

**Figure S4.** Immunocytochemistry assay of phospho-mimetic M87-Spastin proteins upon paclitaxel treatment. T98G cells were transfected with Spastin<sup>M87</sup>\_mutD vector for 24 h with paclitaxel treatment (10 μM). Then, cells were fixed and stained with Myc-tag antibody for Spastin (red), phalloidin for actin filaments (green), and tubulin antibody for microtubule (gray). Cells were visualized by confocal microscopy with a 40x objective.
